# Supplementary material for: Suicide Following Deliberate Self-Harm
Source: Atypon-hosted journal article supplement (doi:10.1176/appi.ajp.2017.16111288), 2017-03-21
Supplement: appi.ajp.2017.16111288.ds001.pdf [file appi.ajp.2017.16111288.ds001.pdf]

TABLE S1. ICD-9 Codes of Diagnostic Groups and Self-Harm Methods

| <i>Diagnostic Group</i>            | <i>ICD-9-Codes</i>                                                                                                                                                              |
|------------------------------------|---------------------------------------------------------------------------------------------------------------------------------------------------------------------------------|
| Depressive disorders               | 296.2x, 296.3x, 296.82, 298.0, 300.4, 311                                                                                                                                       |
| Alcohol use disorders              | 291, 303, 305                                                                                                                                                                   |
| Drug use disorders                 | 292, 304                                                                                                                                                                        |
| Schizophrenia                      | 295.00-295.99                                                                                                                                                                   |
| Bipolar disorders                  | 296.0x, 296.1x, 296.4x, 296.5x, 296.6x, 296.7x, 296.8x<br>(other than 296.82)                                                                                                   |
| Anxiety disorders                  | 300.0x, 300.2x, 300.3, 308.3, 309.81, 293.84, 300.00-<br>300.02, 300.09, 300.20- 300.23, 300.29, 300.3, 300.7,<br>308.0-308.9, 309.21, 309.81, 312.39, 313.0, 313.21,<br>313.23 |
| Personality disorders              | 301                                                                                                                                                                             |
| Other mental disorders             | 290-319 not included in other diagnostic groups                                                                                                                                 |
| <i>Deliberate self-harm method</i> | <i>ICD-9-Codes</i>                                                                                                                                                              |
| Violent                            |                                                                                                                                                                                 |
| Firearm                            | E955.0-955.5, E955.9                                                                                                                                                            |
| Other violent                      | E954; E953.0-.9; E957.0-.9; E958.1, E958.2, E958.3,<br>E958.5, E958.6, E958.7                                                                                                   |
| Non-violent                        |                                                                                                                                                                                 |
| Poisoning                          | E950.0-E952.9                                                                                                                                                                   |
| Cutting                            | E956                                                                                                                                                                            |
| Other                              | E955.6, E955.7, E958.0, E958.4, E958.8, E958.9                                                                                                                                  |

Diagnostic groups define diagnostic categories. Substance use disorders in all tables defined as alcohol use disorders and/or drug use disorders. At least on inpatient or at least two outpatient codes with diagnostic group was required during 180 days prior to self-harm event for diagnostic groups.

TABLE S2. Background characteristics of male and female adult Medicaid patients treated for non-fatal deliberate self-harm

| Characteristic                                         | Total<br>(N=61,297) % | Males<br>(N=20271) % | Females<br>(N=41024) % | Chi square, p-<br>value |
|--------------------------------------------------------|-----------------------|----------------------|------------------------|-------------------------|
| Age, years                                             |                       |                      |                        | 96.4 (<.0001)           |
| 18-34                                                  | 50.7                  | 48.6                 | 51.7                   |                         |
| 35-44                                                  | 27.0                  | 26.9                 | 27.1                   |                         |
| 45-64                                                  | 22.3                  | 24.5                 | 21.2                   |                         |
| Race/Ethnicity                                         |                       |                      |                        | 33.1 (<.0001)           |
| White, non-Hispanic*                                   | 78.0                  | 79.2                 | 77.4                   |                         |
| Black, non-Hispanic                                    | 14.4                  | 14.0                 | 14.6                   |                         |
| Hispanic                                               | 7.6                   | 6.8                  | 8.0                    |                         |
| Recent mental health treatment**                       |                       |                      |                        |                         |
| Depression                                             | 38.2                  | 34.3                 | 40.1                   | 193.1 (<.0001)          |
| Bipolar disorder                                       | 17.5                  | 14.0                 | 19.3                   | 255.8 (<.0001)          |
| Anxiety disorder                                       | 21.1                  | 16.2                 | 23.5                   | 444.8 (<.0001)          |
| Schizophrenia                                          | 16.2                  | 23.4                 | 12.7                   | 1152.1 (<.0001)         |
| Alcohol use disorder                                   | 37.2                  | 43.3                 | 34.1                   | 488.8 (<.0001)          |
| Drug use disorder                                      | 14.7                  | 18.0                 | 13.1                   | 260.7 (<.0001)          |
| Personality disorder                                   | 11.6                  | 9.4                  | 12.7                   | 144.8 (<.0001)          |
| Other mental disorder                                  | 5.2                   | 5.9                  | 4.8                    | 32.3 (<.0001)           |
| Comorbid substance and other mental disorder diagnosis | 34.9                  | 39.4                 | 32.6                   | 272.9 (<.0001)          |
| Recent inpatient mental health care**                  | 23.5                  | 27.2                 | 21.7                   | 228.6 (<.0001)          |
| Recent outpatient mental health care**                 | 56.3                  | 56.6                 | 56.2                   | 1.3 (0.26)              |
| Self-harm treatment setting                            |                       |                      |                        | 5.1 (0.08)              |
| Outpatient                                             | 26.1                  | 26.6                 | 25.8                   |                         |
| Emergency department                                   | 42.5                  | 42.66                | 42.5                   |                         |
| Inpatient                                              | 31.4                  | 30.9                 | 31.6                   |                         |
| Any recent outpatient care                             | 92.3                  | 89.3                 | 93.7                   | 380.2 (<.0001)          |
| Deliberate self-harm method                            |                       |                      |                        |                         |
| Violent method                                         | 3.7                   | 6.5                  | 2.3                    | 12176.0 (<.0001)        |
| Firearm                                                | 1.1                   | 2.3                  | 0.4                    | 1653.5 (<.0001)         |
| Other violent                                          | 2.6                   | 4.2                  | 1.9                    |                         |
| Non-violent method                                     | 86.6                  | 79.9                 | 89.8                   |                         |
| Poisoning                                              | 71.4                  | 62.0                 | 76.0                   |                         |
| Cutting                                                | 15.2                  | 17.9                 | 13.8                   |                         |
| Other                                                  | 9.8                   | 13.6                 | 7.8                    |                         |

\*Includes White, American Indian/Alaskan Native, Asian, Native Hawaiian/Other Pacific Islander, and more than one race

\*\*During 180 day period prior to index self-harm visit

TABLE S3. Method of completed suicide of patients with non-fatal deliberate self-harm who complete suicide within 1 year

| Initial deliberate self-harm method     | Same method used in suicide<br>% | Different method used in suicide<br>% |
|-----------------------------------------|----------------------------------|---------------------------------------|
| Total (n=243), %                        |                                  |                                       |
| Firearm (n=31), %                       | 93.55                            | 6.45                                  |
| Other violent method (n=23), %          | 86.96                            | 13.04                                 |
| Poisoning (n=138), %                    | 63.04                            | 36.96                                 |
| Cutting (n=35), %                       | 8.57                             | 91.43                                 |
| Other (n=9), %                          | 0.00                             | 100.00                                |
| Suicide method missing in seven deaths. |                                  |                                       |

TABLE S4. Cox proportional hazards regression models of death from suicide during year following deliberate self-harm event for adult Medicaid patients

| Characteristic                          | Total Adjusted HR (95% CI) | Males Adjusted HR (95% CI) | Females Adjusted HR (95% CI) | Interaction P-value |
|-----------------------------------------|----------------------------|----------------------------|------------------------------|---------------------|
| <b>Sex</b>                              |                            |                            |                              |                     |
| Male                                    | 2.0 (1.5, 2.7)             | N/A                        | N/A                          | N/A                 |
| Female                                  | 1.0                        | N/A                        | N/A                          | N/A                 |
| <b>Age, years</b>                       |                            |                            |                              |                     |
| 18-34                                   | 1.0                        | 1.0                        | 1.0                          | N/A                 |
| 35-44                                   | 1.9 (1.4, 2.8)             | 1.6 (1.0, 2.7)             | 2.3 (1.4, 3.9)               | 0.28                |
| 45-64                                   | 3.0 (2.2, 4.2)             | 2.7 (1.7, 4.2)             | 3.5 (2.1, 5.7)               | 0.48                |
| <b>Race/Ethnicity</b>                   |                            |                            |                              |                     |
| White, non-Hispanic*                    | 1.0                        | 1.0                        | 1.0                          | N/A                 |
| Black, non-Hispanic                     | 0.3 (0.2, 0.6)             | 0.3 (0.2, 0.8)             | 0.3 (0.1, 0.8)               | 0.99                |
| Hispanic                                | 0.9 (0.5, 1.8)             | 1.22 (0.5, 2.9)            | 0.69 (0.2, 1.9)              | 0.57                |
| <b>Recent mental health treatment**</b> |                            |                            |                              |                     |
| Depression                              | 1.1 (0.8, 1.5)             | 1.3 (0.8, 2.0)             | 0.9 (0.6, 1.5)               | 0.33                |
| Bipolar disorder                        | 0.8 (0.5, 1.4)             | 0.8 (0.4, 1.6)             | 0.8 (0.4, 1.6)               | 0.39                |
| Anxiety disorder                        | 1.1 (0.8, 1.5)             | 0.9 (0.6, 1.5)             | 1.2 (0.8, 1.8)               | 0.21                |
| Schizophrenia                           | 1.0 (0.7, 1.5)             | 1.0 (0.6, 1.6)             | 1.2 (0.6, 2.1)               | 0.21                |
| Alcohol use disorder                    | 0.8 (0.6, 1.0)             | 0.8 (0.5, 1.2)             | 0.8 (0.5, 1.2)               | 0.29                |
| Drug use disorder                       | 1.1 (0.8, 1.6)             | 0.8 (0.4, 1.3)             | 1.7 (1.0, 2.8)               | 0.004               |
| Personality disorder                    | 1.0 (0.7, 1.5)             | 0.9 (0.4, 1.8)             | 1.0 (0.6, 1.8)               | 0.18                |
| Other mental disorder                   | 0.8 (0.3, 1.8)             | 0.6 (0.2, 1.9)             | 1.0 (0.3, 3.5)               | 0.70                |
| Recent inpatient mental health care**   | 1.5 (1.0, 2.0)             | 1.2 (0.7, 1.9)             | 1.9 (1.1, 3.0)               | 0.01                |
| <b>Self-harm treatment setting</b>      |                            |                            |                              |                     |
| Outpatient                              | 1.0                        | 1.0                        | 1.0                          | N/A                 |
| Emergency department                    | 1.3 (0.9, 1.9)             | 1.4 (0.9, 2.4)             | 1.2 (0.7, 2.1)               | 0.92                |
| Inpatient                               | 1.5 (1.1, 2.2)             | 1.7 (1.0, 2.8)             | 1.3 (0.8, 2.3)               | 0.85                |
| Any recent outpatient care**            | 1.3 (0.7, 2.4)             | 1.4 (0.6, 3.1)             | 1.2 (0.4, 3.8)               | 0.86                |
| <b>Deliberate self-harm method</b>      |                            |                            |                              |                     |
| Violent method                          | 6.8 (4.8, 9.4)             | 7.3 (4.9, 10.9)            | 4.8 (2.5, 9.4)               | 0.26                |
| Firearm                                 | 13.7 (8.8, 21.3)           | 13.2 (7.8, 22.4)           | 15.3 (6.6, 35.9)             | 0.91                |
| Other violent method                    | 4.4 (2.7, 7.1)             | 5.8 (3.3, 10.1)            | 2.2 (0.8, 6.2)               | 0.13                |
| Non-violent method                      | 1.0                        | 1.0                        | 1.0                          | N/A                 |
| Poisoning                               | 1.0                        | 1.0                        | 1.0                          | N/A                 |
| Cutting                                 | 1.2 (0.8, 1.8)             | 1.7 (1.0, 2.8)             | 0.8 (0.4, 1.5)               | 0.10                |
| Other                                   | 0.3 (0.1, 0.8)             | 0.2 (0.1, 0.9)             | 0.4 (0.1, 1.4)               | 0.39                |
| Other                                   | 0.3 (0.1, 0.8)             | 0.3 (0.1, 1.1)             | 0.4 (0.1, 1.3)               | 0.49                |

Adjusted HRs are from a single model that also controls for geographic region.

\*Includes White, American Indian/Alaskan Native, Asian, Native Hawaiian/Other Pacific Islander, and more than one race \*\*During 180 days prior to the date of the index deliberate self-harm event.

TABLE S5. Multinomial logistic regression models of timing of suicide death following non-fatal deliberate self-harm event for adult Medicaid patients

| Characteristic                               | Suicide<br>First 30 days<br>(Reference: No<br>Suicide)<br>OR (95% CI) | Suicide<br>Day 31-365<br>(Reference: No<br>Suicide)<br>OR (95% CI) | Suicide<br>First 30 days<br>(Reference: Suicide<br>31-365 Days)<br>OR (95% CI) |
|----------------------------------------------|-----------------------------------------------------------------------|--------------------------------------------------------------------|--------------------------------------------------------------------------------|
| <b>Sex</b>                                   |                                                                       |                                                                    |                                                                                |
| Male                                         | 2.8 (1.8, 4.5)                                                        | 1.6 (1.1, 2.2)                                                     | 1.6 (0.8, 3.2)                                                                 |
| Female                                       | 1.0                                                                   | 1.0                                                                | 1.0                                                                            |
| <b>Age, years</b>                            | 1.0                                                                   | 1.0                                                                | 1.0                                                                            |
| 18-34                                        | 2.1 (1.2, 3.5)                                                        | 1.9 (1.2, 3.0)                                                     | 1.3 (0.6, 3.1)                                                                 |
| 35-44                                        | 2.8 (1.6, 4.6)                                                        | 3.2 (2.1, 5.0)                                                     | 1.0 (0.4, 2.2)                                                                 |
| 45-64                                        |                                                                       |                                                                    |                                                                                |
| <b>Race/Ethnicity</b>                        | 1.0                                                                   | 1.0                                                                | 1.0                                                                            |
| White, non-Hispanic*                         | 0.2 (0.1, 0.6)                                                        | 0.4 (0.2, 0.9)                                                     | 0.4 (0.1, 2.2)                                                                 |
| Black, non-Hispanic                          | 1.6 (0.7, 3.8)                                                        | 0.5 (0.1, 1.5)                                                     | 2.2 (0.4, 13.6)                                                                |
| Hispanic                                     |                                                                       |                                                                    |                                                                                |
| <b>Recent mental health treatment**</b>      | 1.1 (0.7, 1.8)                                                        | 1.1 (0.7, 1.7)                                                     | 1.1 (0.5, 2.4)                                                                 |
| Depression                                   | 0.9 (0.4, 1.8)                                                        | 0.8 (0.5, 1.6)                                                     | 1.1 (0.3, 3.4)                                                                 |
| Bipolar disorder                             | 0.6 (0.3, 1.1)                                                        | 1.4 (0.9, 2.1)                                                     | 0.5 (0.2, 1.2)                                                                 |
| Anxiety disorder                             | 0.8 (0.4, 1.5)                                                        | 1.3 (0.8, 2.1)                                                     | 0.7 (0.3, 1.8)                                                                 |
| Schizophrenia                                | 0.7 (0.4, 1.1)                                                        | 0.8 (0.6, 1.2)                                                     | 0.9 (0.4, 1.9)                                                                 |
| Alcohol use disorder                         | 0.7 (0.4, 1.4)                                                        | 1.4 (0.9, 2.3)                                                     | 0.8 (0.3, 2.0)                                                                 |
| Drug use disorder                            | 1.0 (0.5, 2.1)                                                        | 1.0 (0.6, 1.7)                                                     | 0.9 (0.3, 2.6)                                                                 |
| Personality disorder                         | 0.7 (0.2, 2.3)                                                        | 0.8 (0.2, 2.7)                                                     | 0.5 (0.1, 5.2)                                                                 |
| Other mental disorder                        |                                                                       |                                                                    |                                                                                |
| <b>Recent inpatient mental health care**</b> | 1.4 (0.8, 2.5)                                                        | 1.5 (1.0, 2.4)                                                     | 1.2 (0.5, 2.8)                                                                 |
| <b>Self-harm treatment setting</b>           |                                                                       |                                                                    |                                                                                |
| Outpatient                                   | 1.0                                                                   | 1.0                                                                | 1.0                                                                            |
| Emergency department                         | 1.8 (1.0, 3.3)                                                        | 1.0 (0.6, 1.6)                                                     | 1.3 (0.5, 3.2)                                                                 |
| Inpatient                                    | 2.5 (1.4, 4.4)                                                        | 1.0 (0.6, 1.6)                                                     | 1.9 (0.8, 5.0)                                                                 |
| <b>Any recent outpatient care**</b>          | 2.0 (0.7, 5.6)                                                        | 0.9 (0.4, 2.1)                                                     | 2.0 (0.4, 9.7)                                                                 |
| <b>Deliberate self-harm method</b>           |                                                                       |                                                                    |                                                                                |
| Violent method                               | 17.5 (11.2, 27.3)                                                     | 1.7 (0.8, 3.5)                                                     | 10.0 (3.9, 25.5)                                                               |
| Firearm                                      | 33.1 (18.8, 58.1)                                                     | 2.5 (0.8, 8.1)                                                     | 11.0 (2.9, 41.7)                                                               |
| Other violent method                         | 11.0 (6.0, 20.2)                                                      | 1.5 (0.6, 3.7)                                                     | 8.4 (2.4, 30.2)                                                                |
| Non-violent method                           | 1.0                                                                   | 1.0                                                                | 1.0                                                                            |
| Poisoning                                    | 1.0                                                                   | 1.0                                                                | 1.0                                                                            |
| Cutting                                      | 1.2 (0.6, 2.4)                                                        | 1.2 (0.8, 2.0)                                                     | 0.8 (0.3, 2.3)                                                                 |
| Other                                        | 0.7 (0.2, 2.2)                                                        | 0.2 (0.0, 0.7)                                                     | 4.7 (0.5, 45.6)                                                                |
| Other                                        | 0.7 (0.2, 2.2)                                                        | 0.2 (0.0, 0.7)                                                     | 4.5 (0.4, 43.0)                                                                |

Adjusted ORs are from single multinomial logistic models that also controls for geographic region.

\*Includes White, American Indian/Alaskan Native, Asian, Native Hawaiian/Other Pacific Islander, and more than one race \*\*During 180 days prior to the index deliberate self-harm code.
